# Supplementary material for: Flexible lead-free cruciform piezo-arrays for implantable wireless energy harvesting on complex surfaces
Source: Royal Society of Chemistry journal article supplement (doi:10.1039/d4ta00836g), 2024-01-01
Supplement: d4ta00836g1.pdf [file d4ta00836g1.pdf]

## Supporting Information

### **Flexible lead-free cruciform piezo-arrays for implantable wireless energy harvesting on complex surfaces**

Chong Zhu, Haoyue Xue, Qin Zhou, Laiming Jiang\*, Jiagang Wu\*

College of Materials Science and Engineering, Sichuan University, Chengdu 610064,  
China.

\*Corresponding authors. E-mail: [laimingjiang@scu.edu.cn](mailto:laimingjiang@scu.edu.cn); [msewujg@scu.edu.cn](mailto:msewujg@scu.edu.cn)

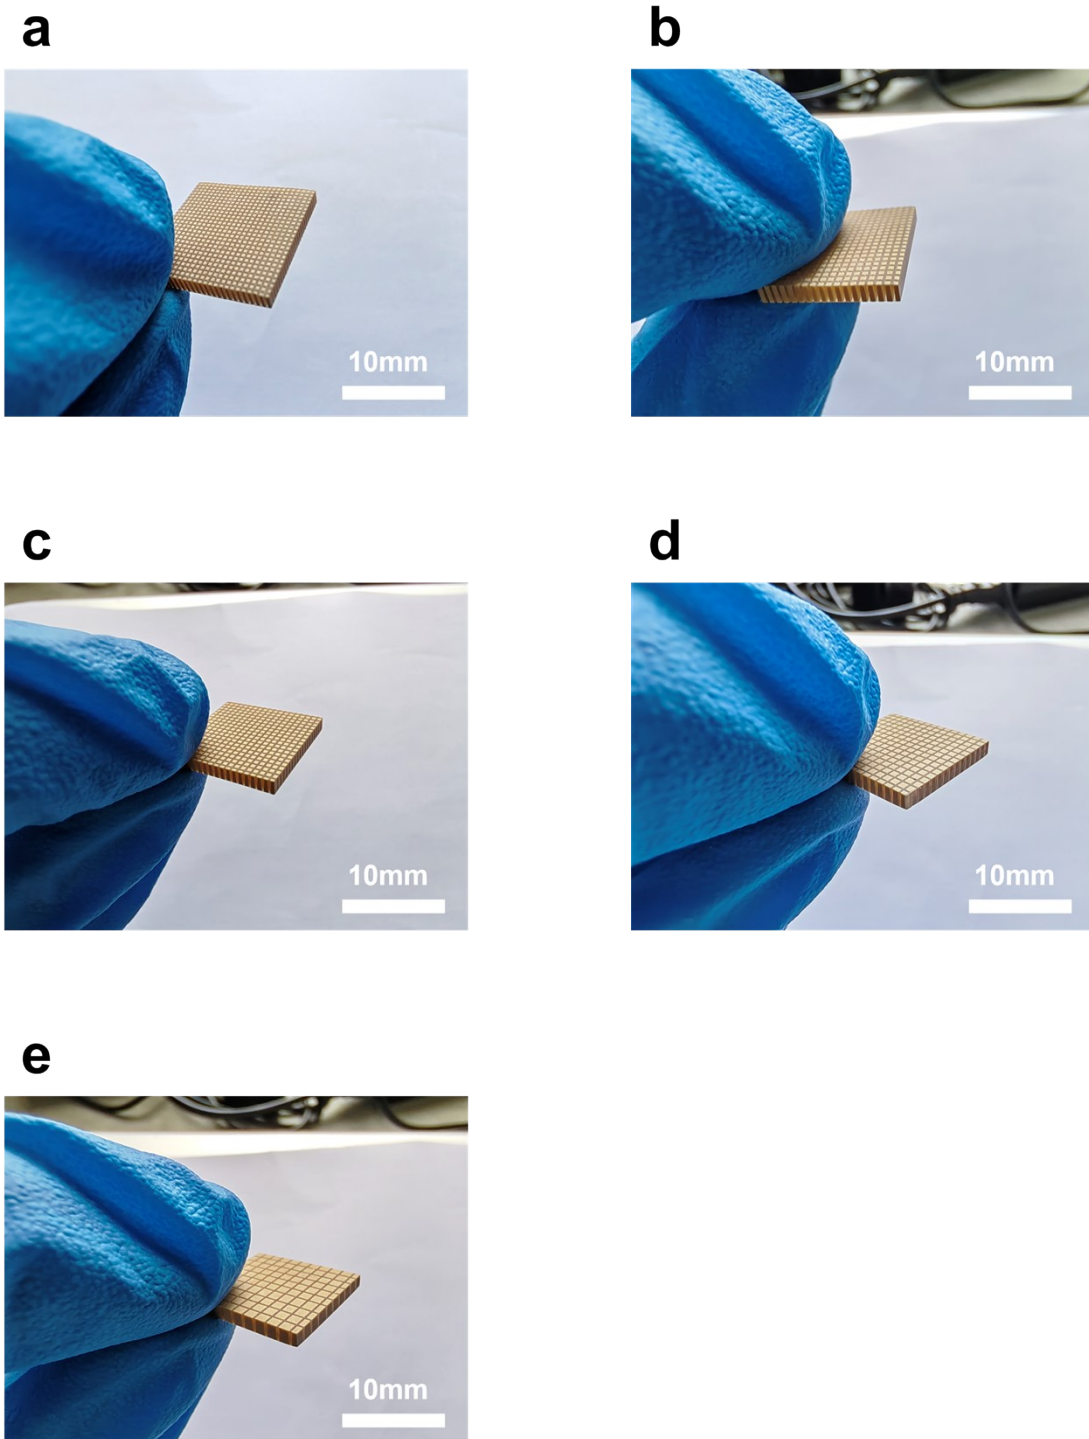

**Figure S1 KNN-based 1-3 composites at different dicing distances (ceramic volume fraction). (a) is 0.5 mm; (b) is 0.6 mm; (d) is 0.7 mm; (b) is 0.9 mm; (e) is 1.3 mm.**

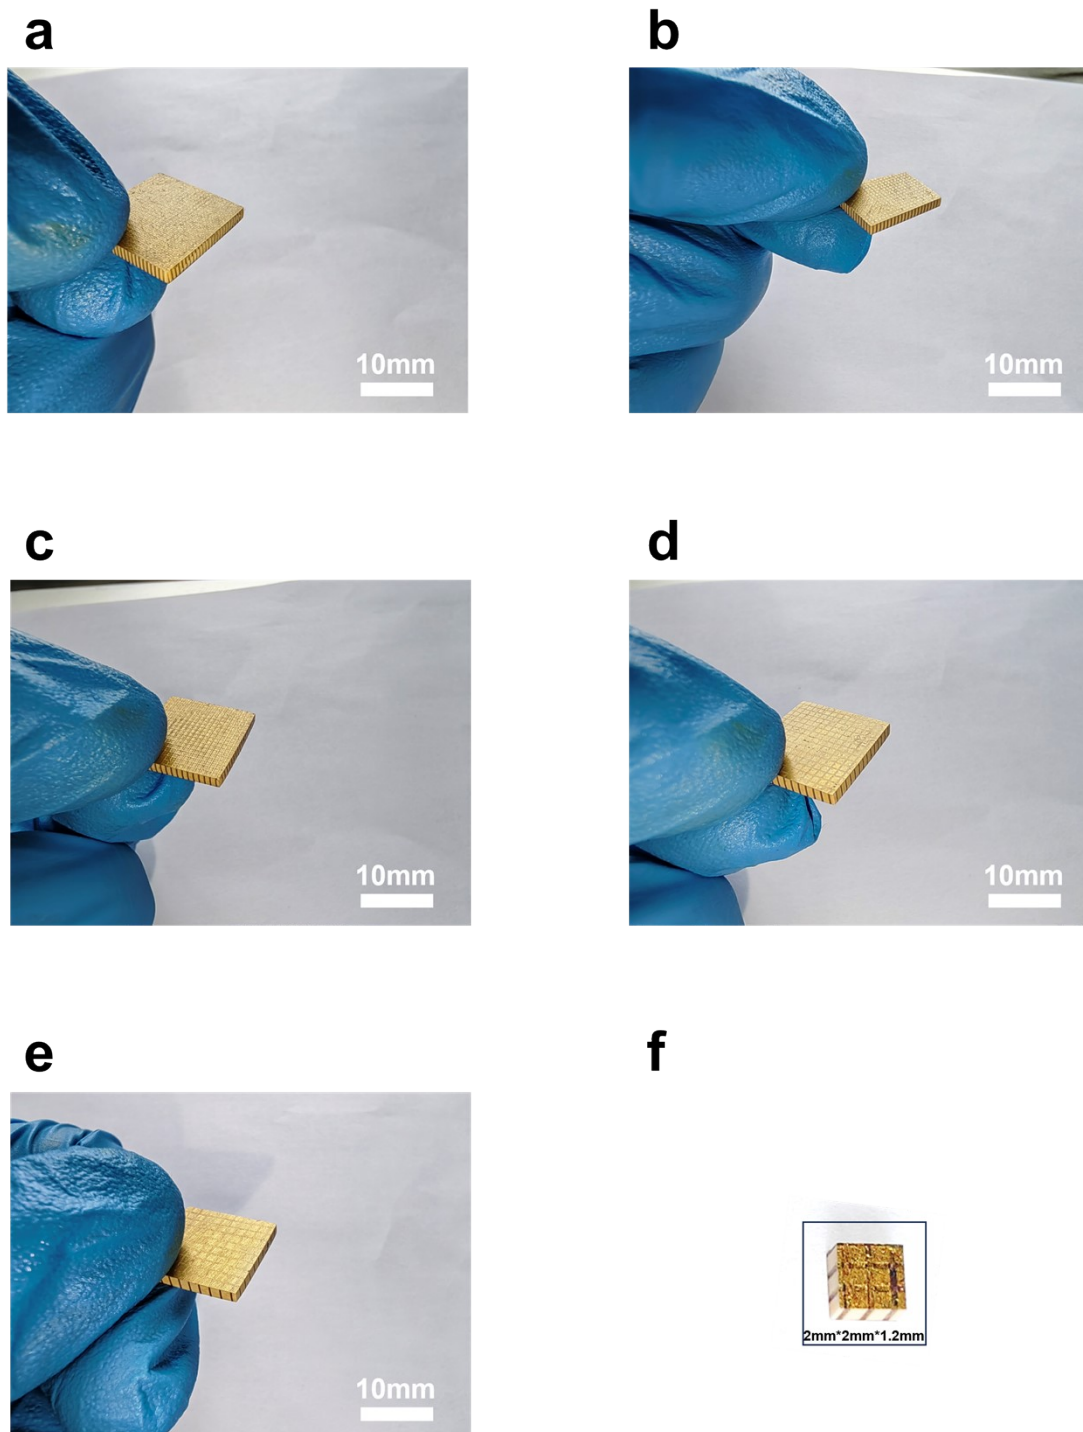

**Figure S2 KNN-based 1-3 composites plated with gold electrodes.** (a) is 0.5 mm; (b) is 0.6 mm; (c) is 0.7 mm; (d) is 0.9 mm; (e) is 1.3 mm; (f) KNN-based piezocomposite unit.

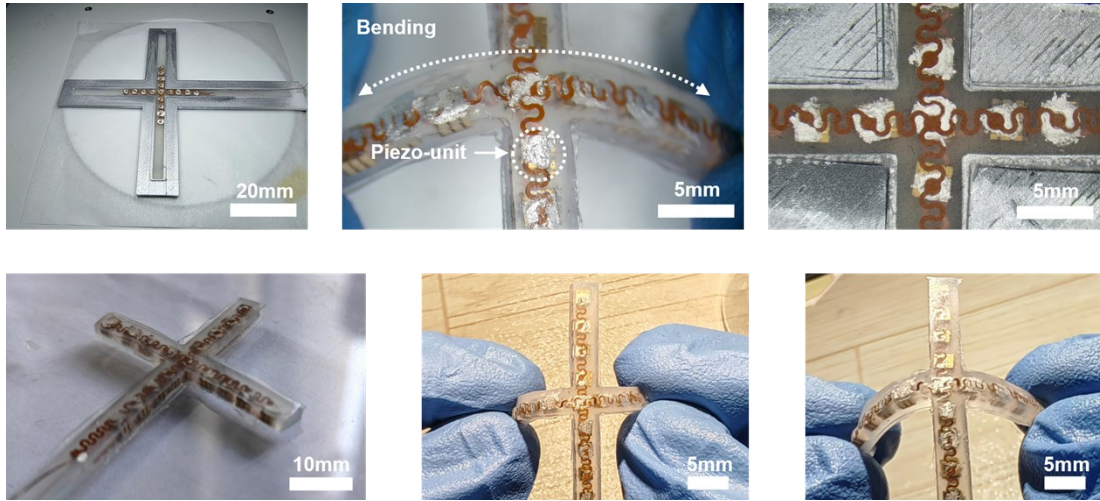

**Figure S3 Flexible cruciform ultrasonic device.**

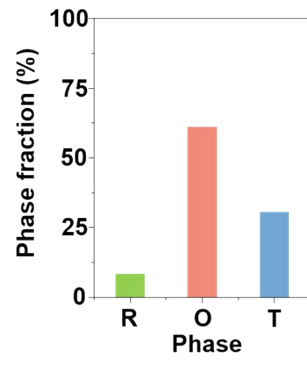

**Figure S4** Phase fraction of each phase of KNN-based ceramics.

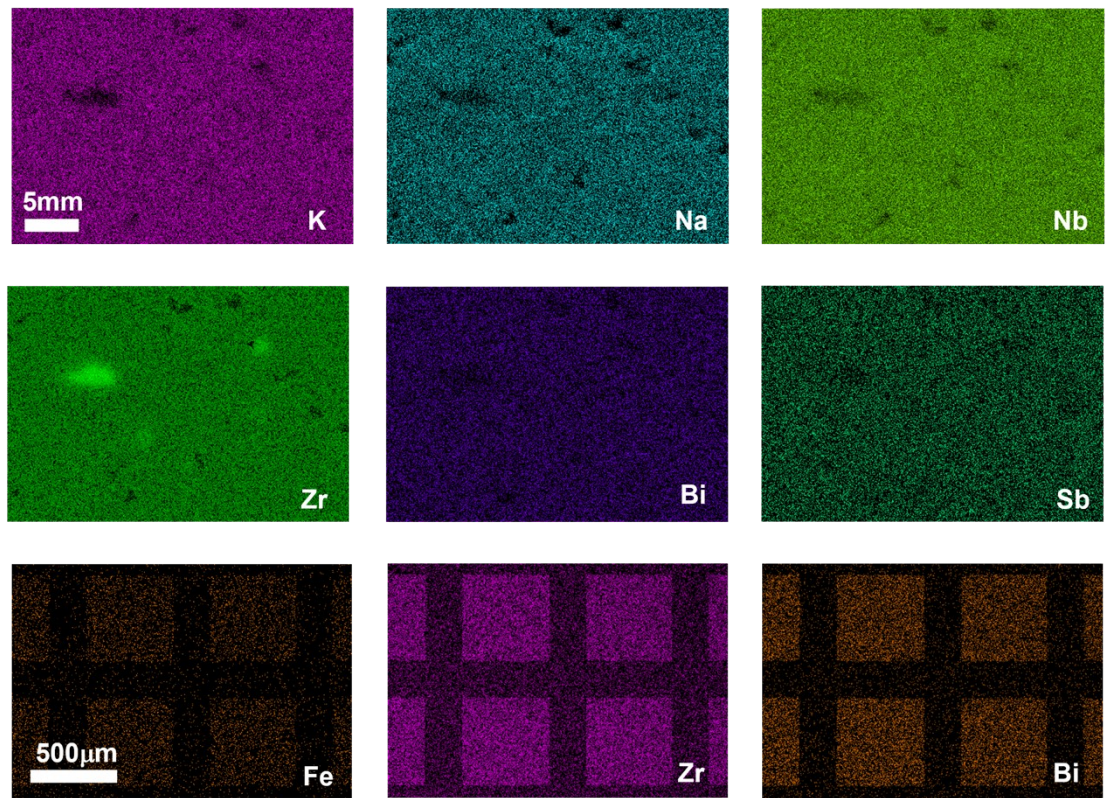

**Figure S5 Corresponding element mapping results of KNN-based ceramic and 1-3 composites**

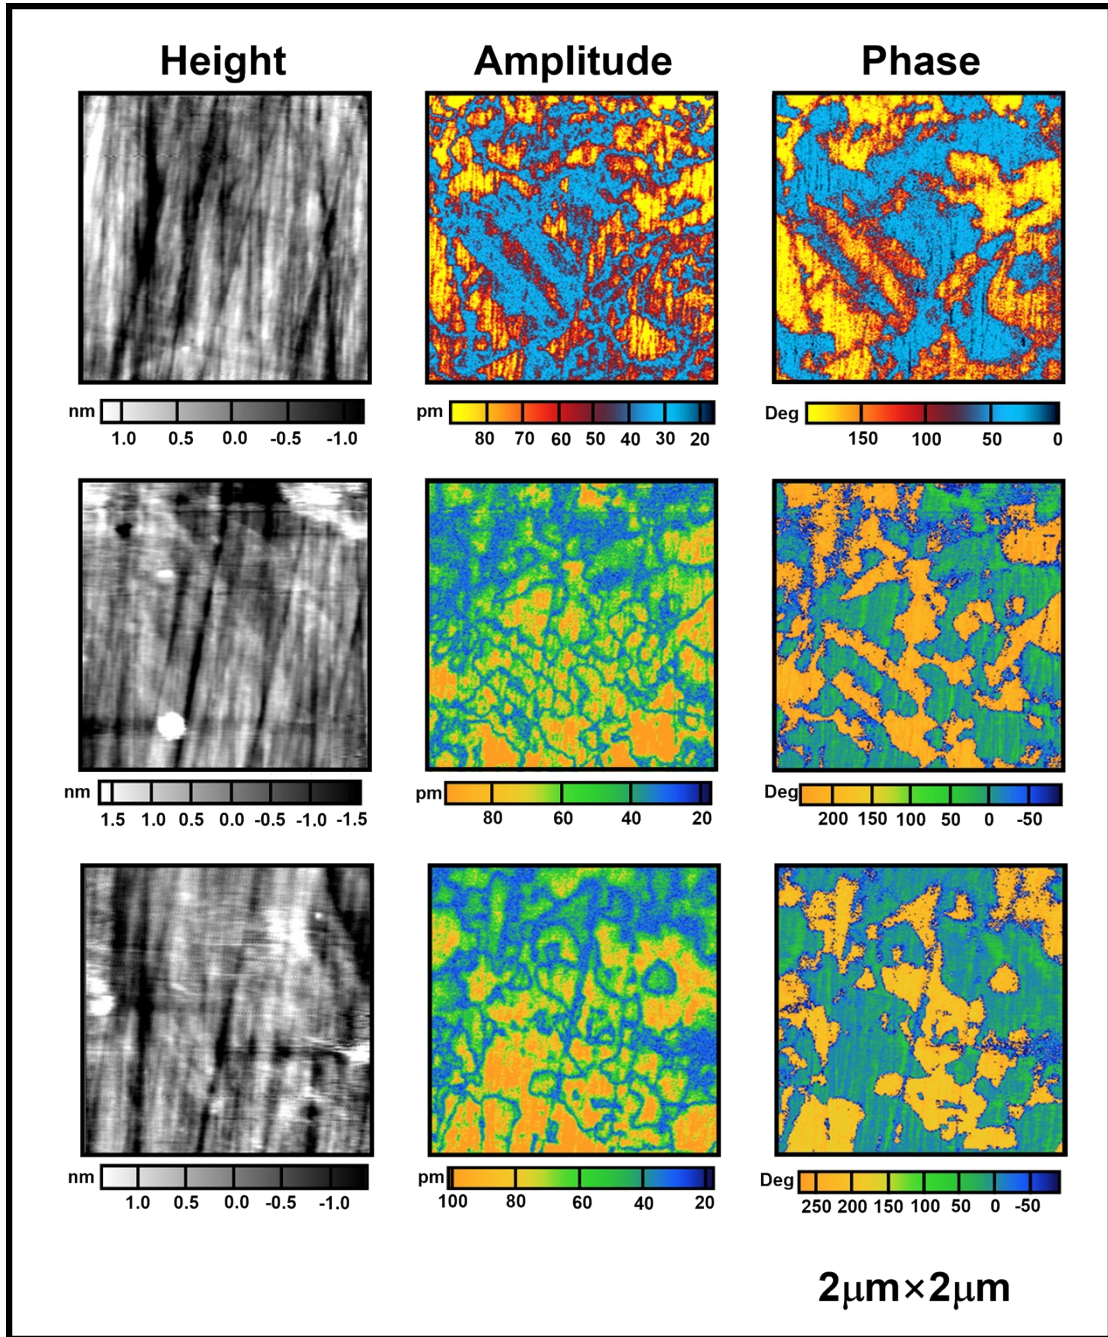

Figure S6 PFM characterization.

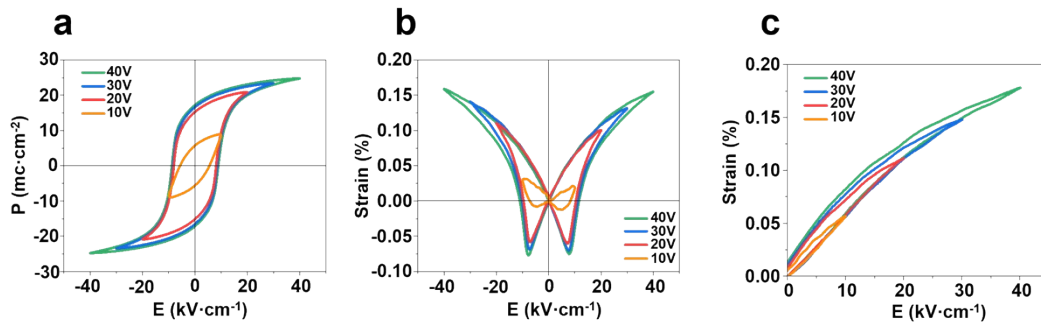

**Figure S7 Ferroelectric and strain curves.** (a) P-E loops of the dense ceramic. (b) Bipolar strain curves of the dense ceramic. (c) Unipolar strain curves of the dense ceramic.



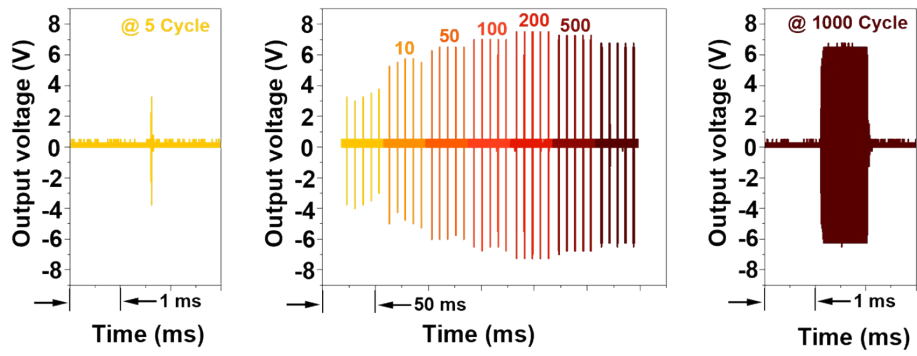

**Figure S8 Characterizations of the output voltage.** A Output voltage signal of the device measured at different cycles. Ultrasound-induced energy transmission can be regulated by setting trigger cycles.

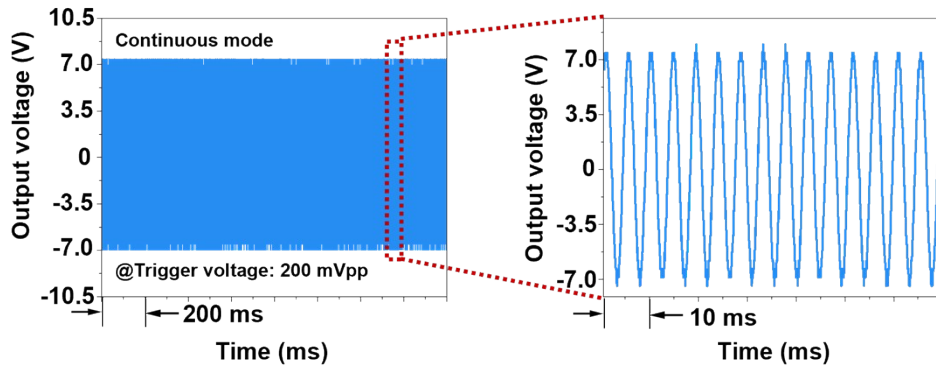

**Figure S9 Output voltage in a continuous mode.** (a) and (b) Characterizations of the output voltage of the device when the input voltage is 200 mVpp in a continuous mode. A continuous 200 mVpp 200 kHz sinusoidal signal was switched to drive the ultrasonic transmitter, generating a continuous sinusoidal signal, indicating the output signals are purely induced by the piezoelectric effect of the device.

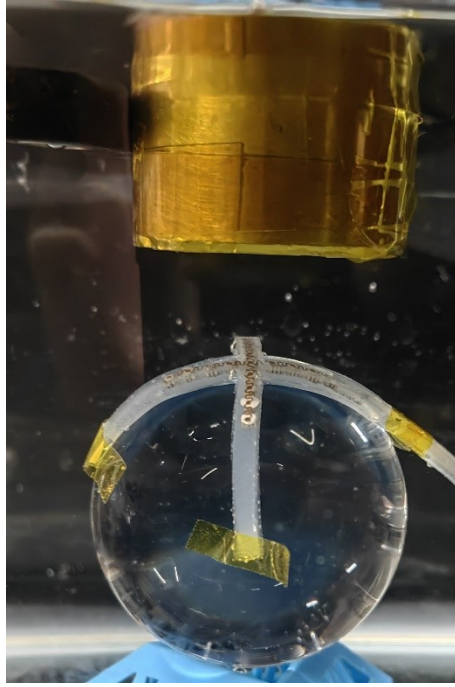

**Figure S10 Schematic diagram of ultrasonic testing in the spherical surface.**
